# Supplementary material for: Intrinsic ferromagnetic semiconductivity realized in a new MoS2 monolayer
Source: Royal Society of Chemistry journal article supplement (doi:10.1039/c9cp05804d), 2020-01-01
Supplement: c9cp05804d1.pdf [file c9cp05804d1.pdf]

## Supplementary Information

# Intrinsic ferromagnetism semiconductivity realized in a new MoS<sub>2</sub> monolayer

Xiaohui Deng<sup>\*ab</sup>, Zhenyu Li<sup>a</sup>

*<sup>a</sup> Hefei National Laboratory for Physical Sciences at the Microscale and Synergetic Innovation Center of Quantum Information & Quantum Physics, University of Science and Technology of China, Hefei, Anhui 230026, China*

*<sup>b</sup> College of Physics and Electronic Engineering, Hengyang Normal University, Hengyang, Hunan 421002, China*

**Table S1.** The calculated lattice constants  $a$  ( $b$ ), relative energy  $E_r$ , atomic density and band gap  $E_G$ .

|                                         | H            | T            | D <sub>2</sub> |
|-----------------------------------------|--------------|--------------|----------------|
| $a, b$ (Å)                              | 3.188, 3.188 | 3.206, 3.206 | 4.790, 3.574   |
| $E_r$ (eV)                              | 0            | 0.79         | 1.26           |
| $n$ (MoS <sub>2</sub> /Å <sup>2</sup> ) | 0.98         | 0.97         | 0.29           |
| $E_G$ (eV)                              | 1.90         | Metallic     | 0.21           |

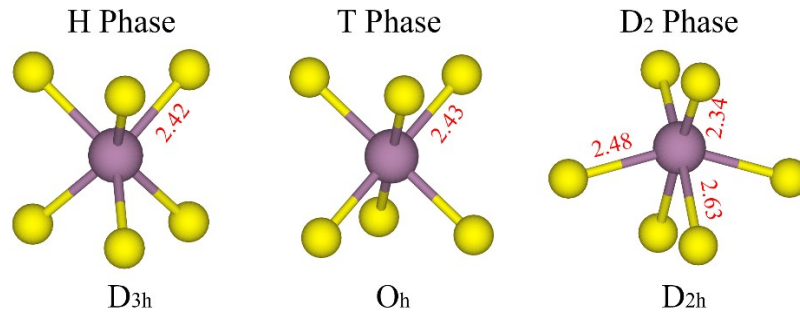

**Fig. S1** Different MoS<sub>6</sub> symmetries and the calculated Mo-S bond lengths for H, T and D<sub>2</sub> phases.

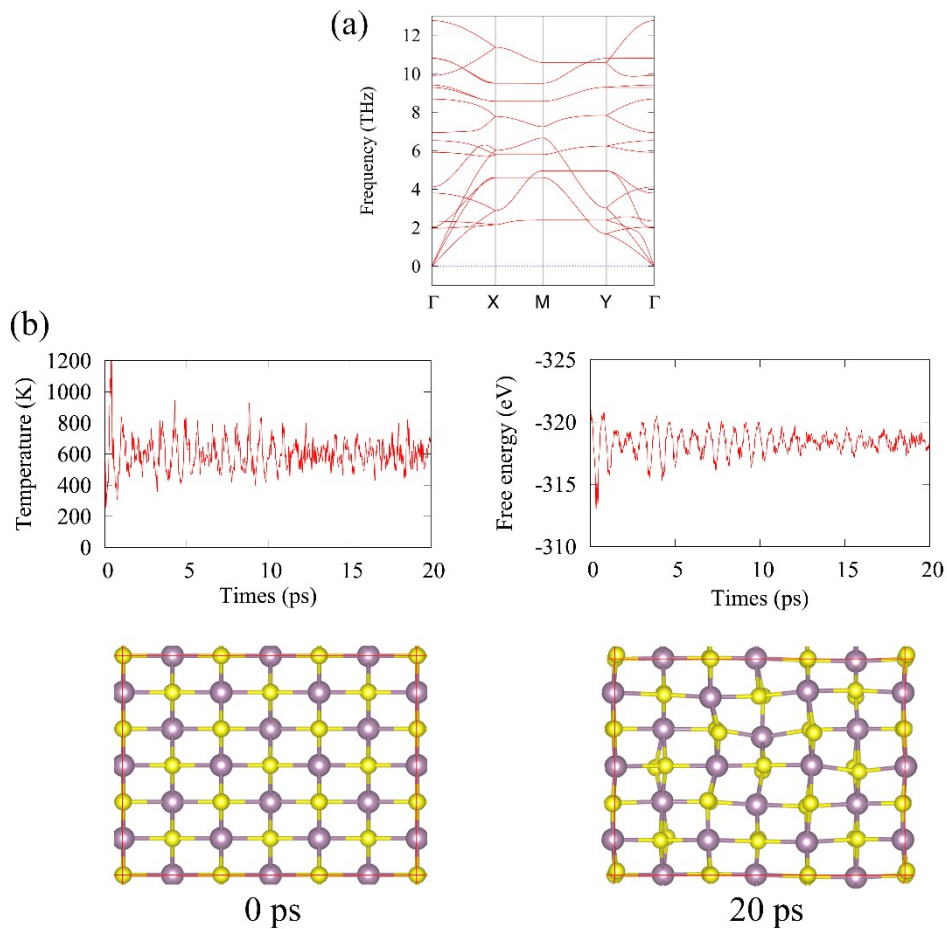

**Fig. S2** (a) Phonon spectrum and (b) MD simulation at 600K.

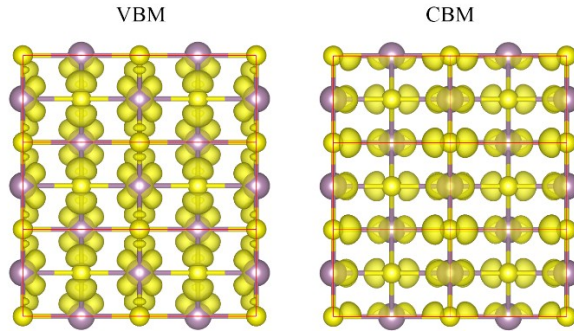

**Fig. S3** Real space partial charge density for VBM and CBM.

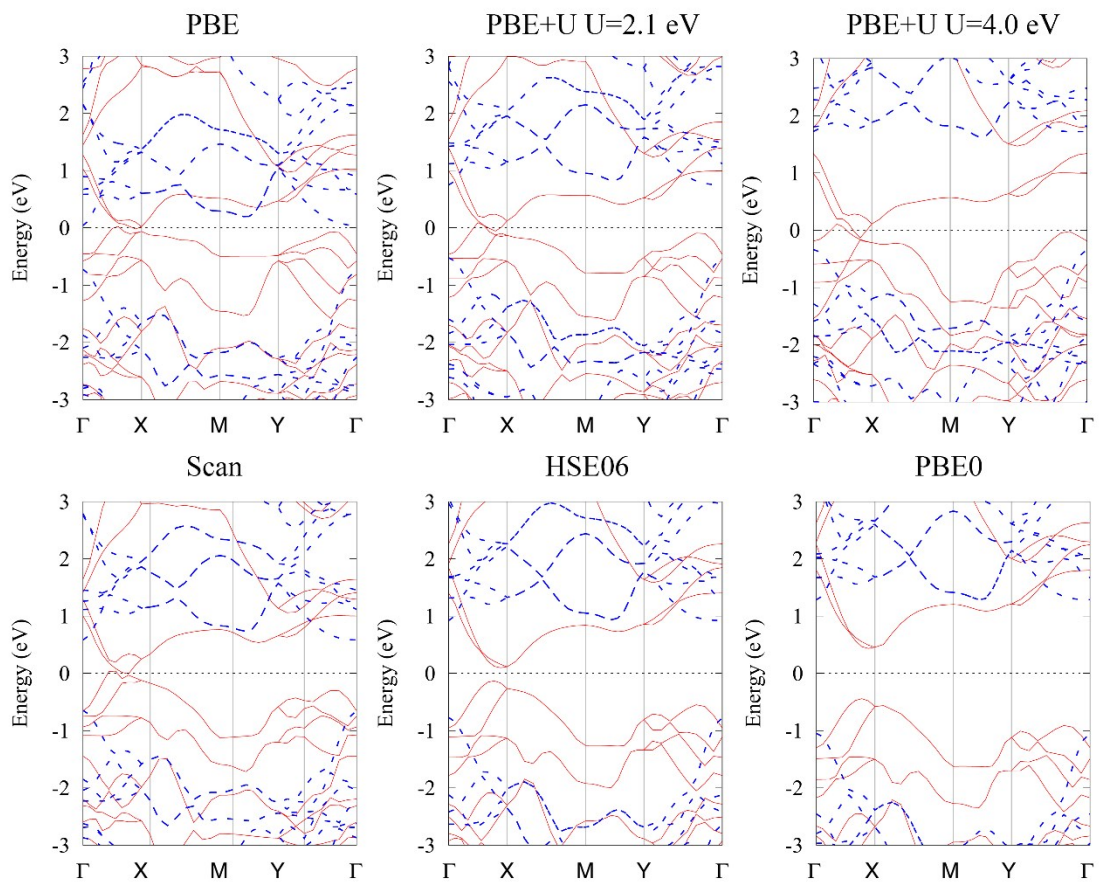

**Fig. S4** Electronic band structure by using different functional.

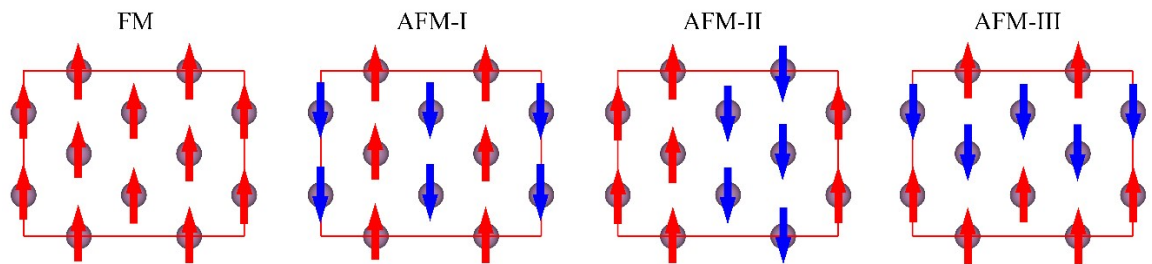

**Fig. S5** The  $2 \times 2$  Mo supercells for ferromagnetic ground state and three antiferromagnetic states to calculate the exchange coupling strength. The relative energy for these magnetic states are 0, 0.207, 0.339 and 1.601 meV, respectively.

**Note 1:** Computational detail for exchange coupling strength

According to equation 1, the energies arising from spin exchange for FM, AFM-I, AFM-II and AFM-III can be written as,

$$E_{FM} = -8J_1M^2 - 16J_2M^2 - 8J_3M^2, \quad (S1)$$

$$E_{AFM-I} = -8J_1M^2 + 16J_2M^2 - 8J_3M^2, \quad (S2)$$

$$E_{AFM-II} = -8J_1M^2 + 8J_3M^2, \quad (S3)$$

$$E_{AFM-III} = +8J_1M^2 - 8J_3M^2. \quad (S4)$$

Therefore,  $J_1$ ,  $J_2$  and  $J_3$  can be obtained,

$$J_2 = \frac{E_{AFM-I} - E_{FM}}{32M^2}, \quad (S5)$$

$$J_3 = \frac{(E_{AFM-II} - E_{AFM-I}) + 16J_2M^2}{16M^2}, \quad (S6)$$

$$J_1 = \frac{(E_{AFM-III} - E_{AFM-I}) + 16J_2M^2}{16M^2}. \quad (S7)$$

**Note 2: Monte Carlo (MC) simulation**

A  $24 \times 24$  spin grid is chosen for MC simulation. Spin Hamiltonian induced by magnetic coupling takes equation 1. In each MC step, the spin can flip randomly in all directions. If its energy change  $\Delta E \leq 0$ , we accept this flip. If  $\Delta E > 0$ , we accept this

flip with a probability of  $e^{-\Delta E/(k_B T)}$ . To obtain the transition temperature, we perform MC simulations at 0~700 K with a step of 10 K. At each temperature, we first run  $10^8$  MC steps to achieve the equilibrium and following  $10^8$  MC steps are used for sampling. The Curie temperature is taken as the critical point of the specific heat, defined as  $C(T) = (\langle E^2 \rangle - \langle E \rangle^2)/T^2$ .

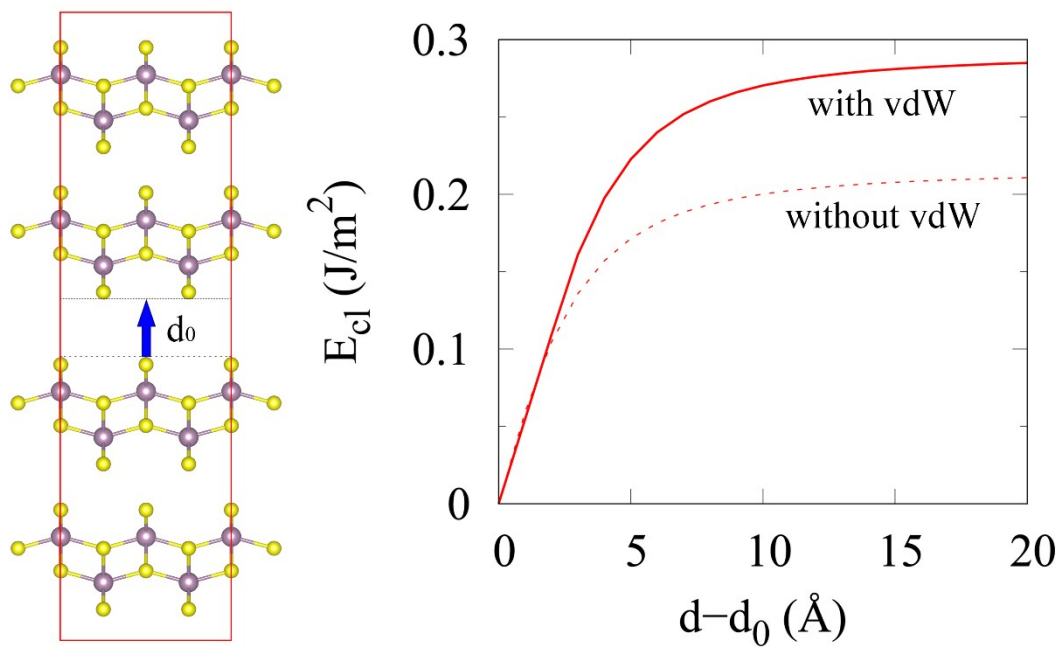

**Fig. S6** Cleave scheme and energy for  $D_2$  MoS<sub>2</sub> phase.
